# Supplementary material
Source: Springer Nature journal article supplement (https://www.springermedizin.de/resource/supplementary/12943_2007_328_MOESM8_ESM.pdf/9553936)

## Astrocytes

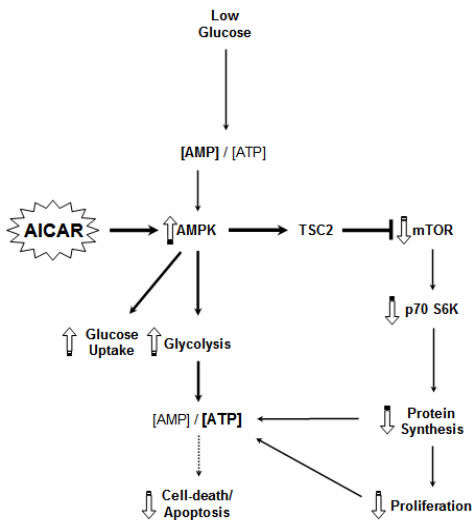

## CT-2A cells

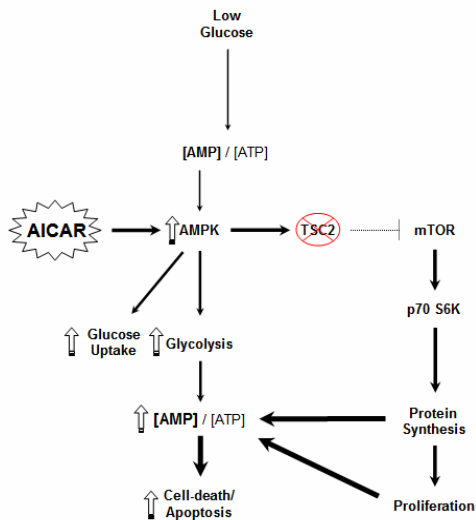

## Astrocytes

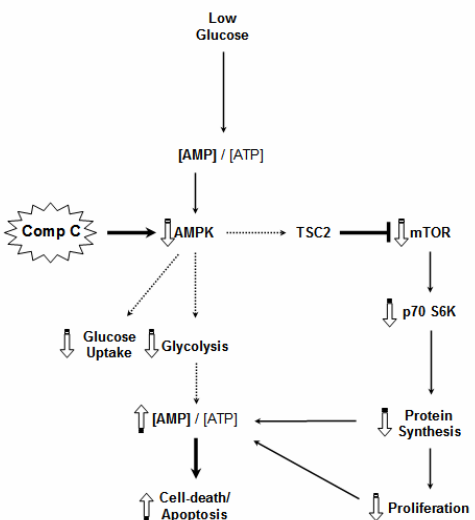

## CT-2A cells

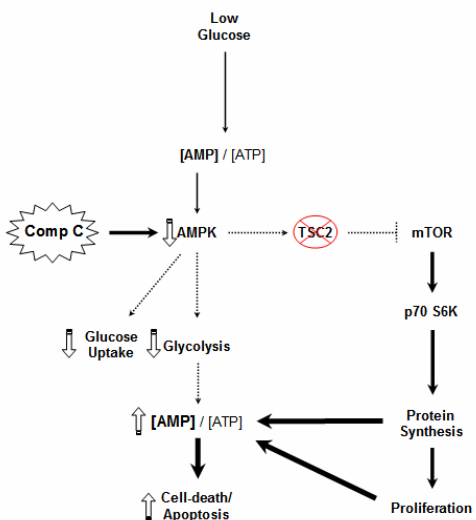

Supplement: MOESM8 [file 9553936]
